# Supplementary material
Source: Springer Nature journal article supplement (https://www.springermedizin.de/resource/supplementary/12884_2010_303_MOESM1_ESM.pdf/9457418)

 **Intervention area**

 **Control area**

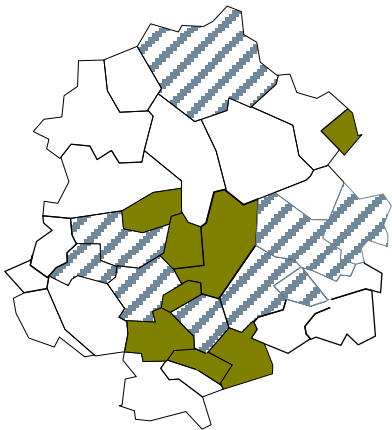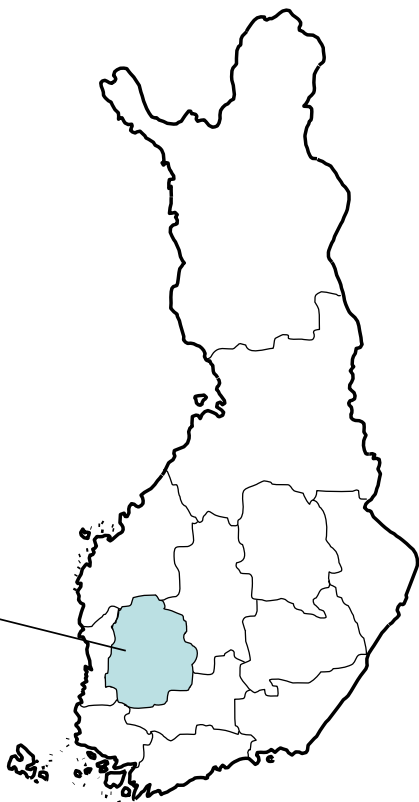

Supplement: MOESM1 [file 9457418]
